# Supplementary material for: 5-hydroxymethylcytosine profiles in circulating cell-free DNA associate with disease status in patients with osteosarcoma
Source: Research Square preprint supplement (doi:10.21203/rs.3.rs-7199550/v1), 2025-09-01

**Supplementary Figure 1: Receiver operator curve (ROC) for osteosarcoma signatures against disease status for all patient samples in both cohorts.** AUC indicates area under the curve and is shown in blue text with the 95% confidence interval reported in parentheses. 95% Confidence intervals are shown along the ROC graph in light blue shading.

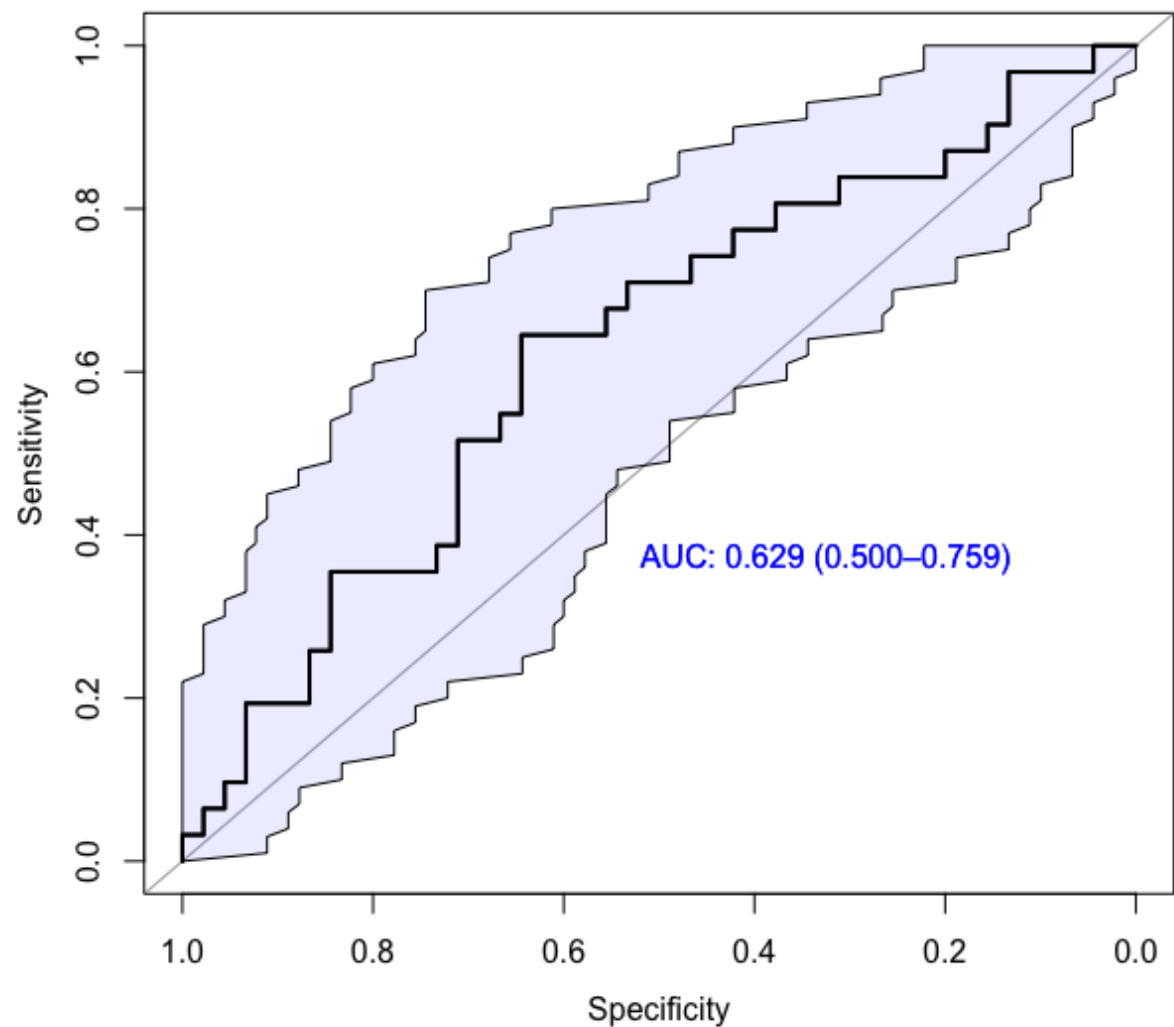

**Supplementary Figure 2: Violin plot of osteosarcoma signature scores by clinical status in all osteosarcoma patients and well children.** Horizontal lines are at the median score for each group. The gene set used in this analysis contained 136 genes identified to have increased 5-hmC in osteosarcoma patients versus healthy controls. \*:  $p < 0.05$  by Kruskal-Wallis test with post-hoc Dunn's testing.

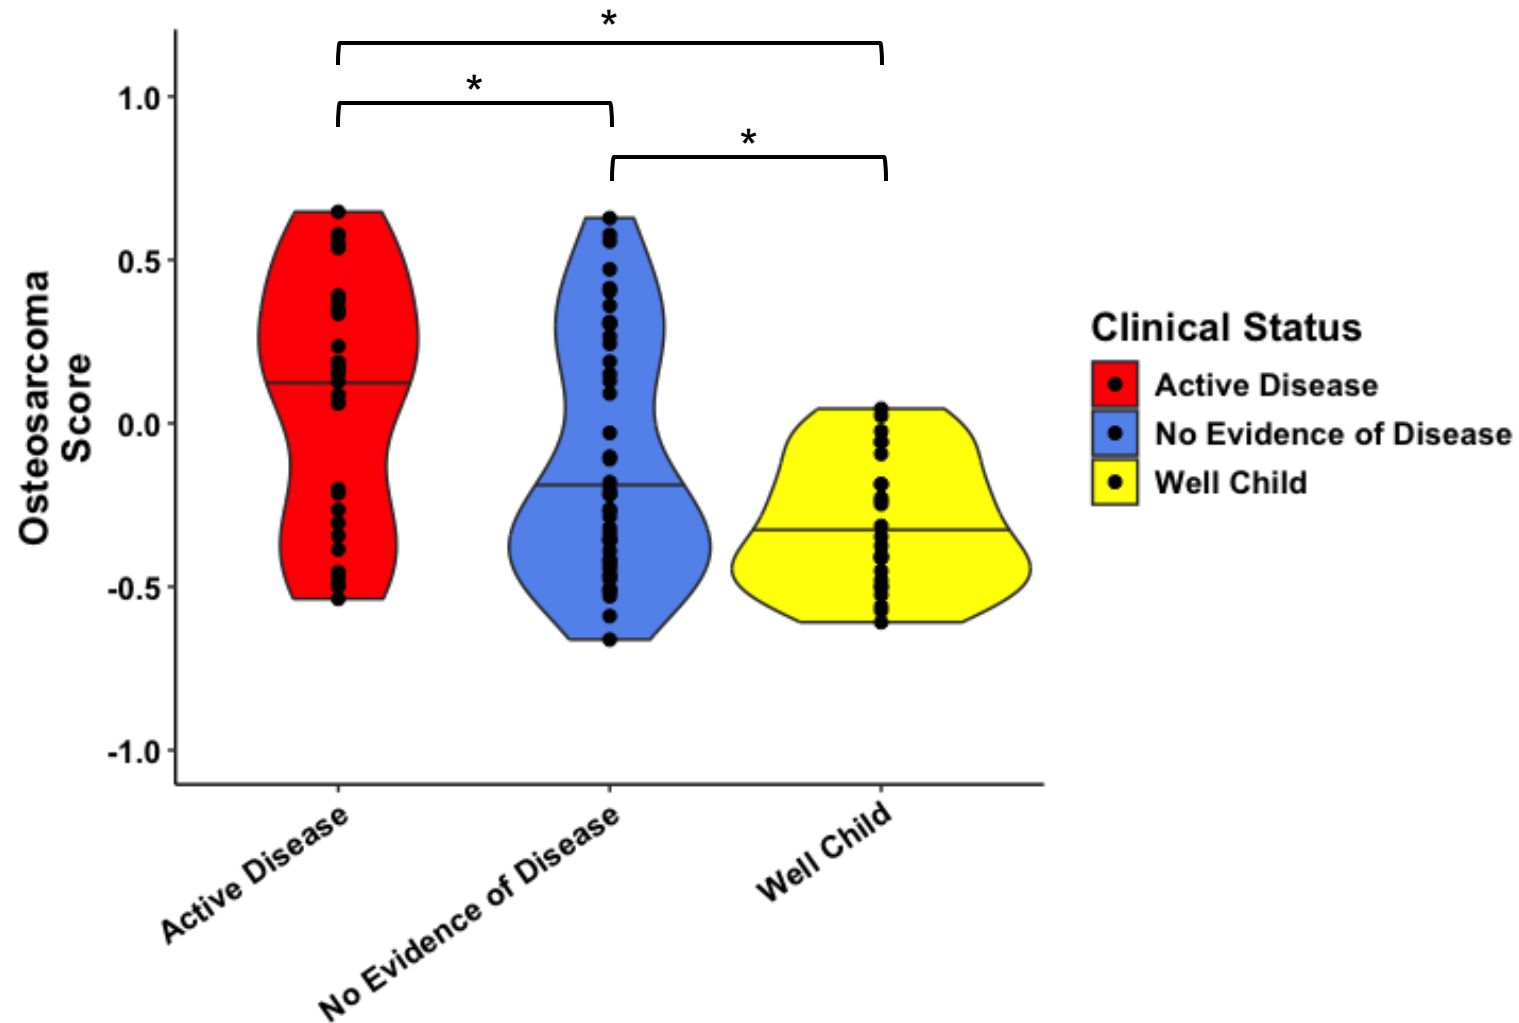

**Supplementary Figure 3: Representative images of osteosarcoma signature scores.** Serial samples obtained from two patients before and after resection of either A) a metastatic relapse or B) their primary tumor.

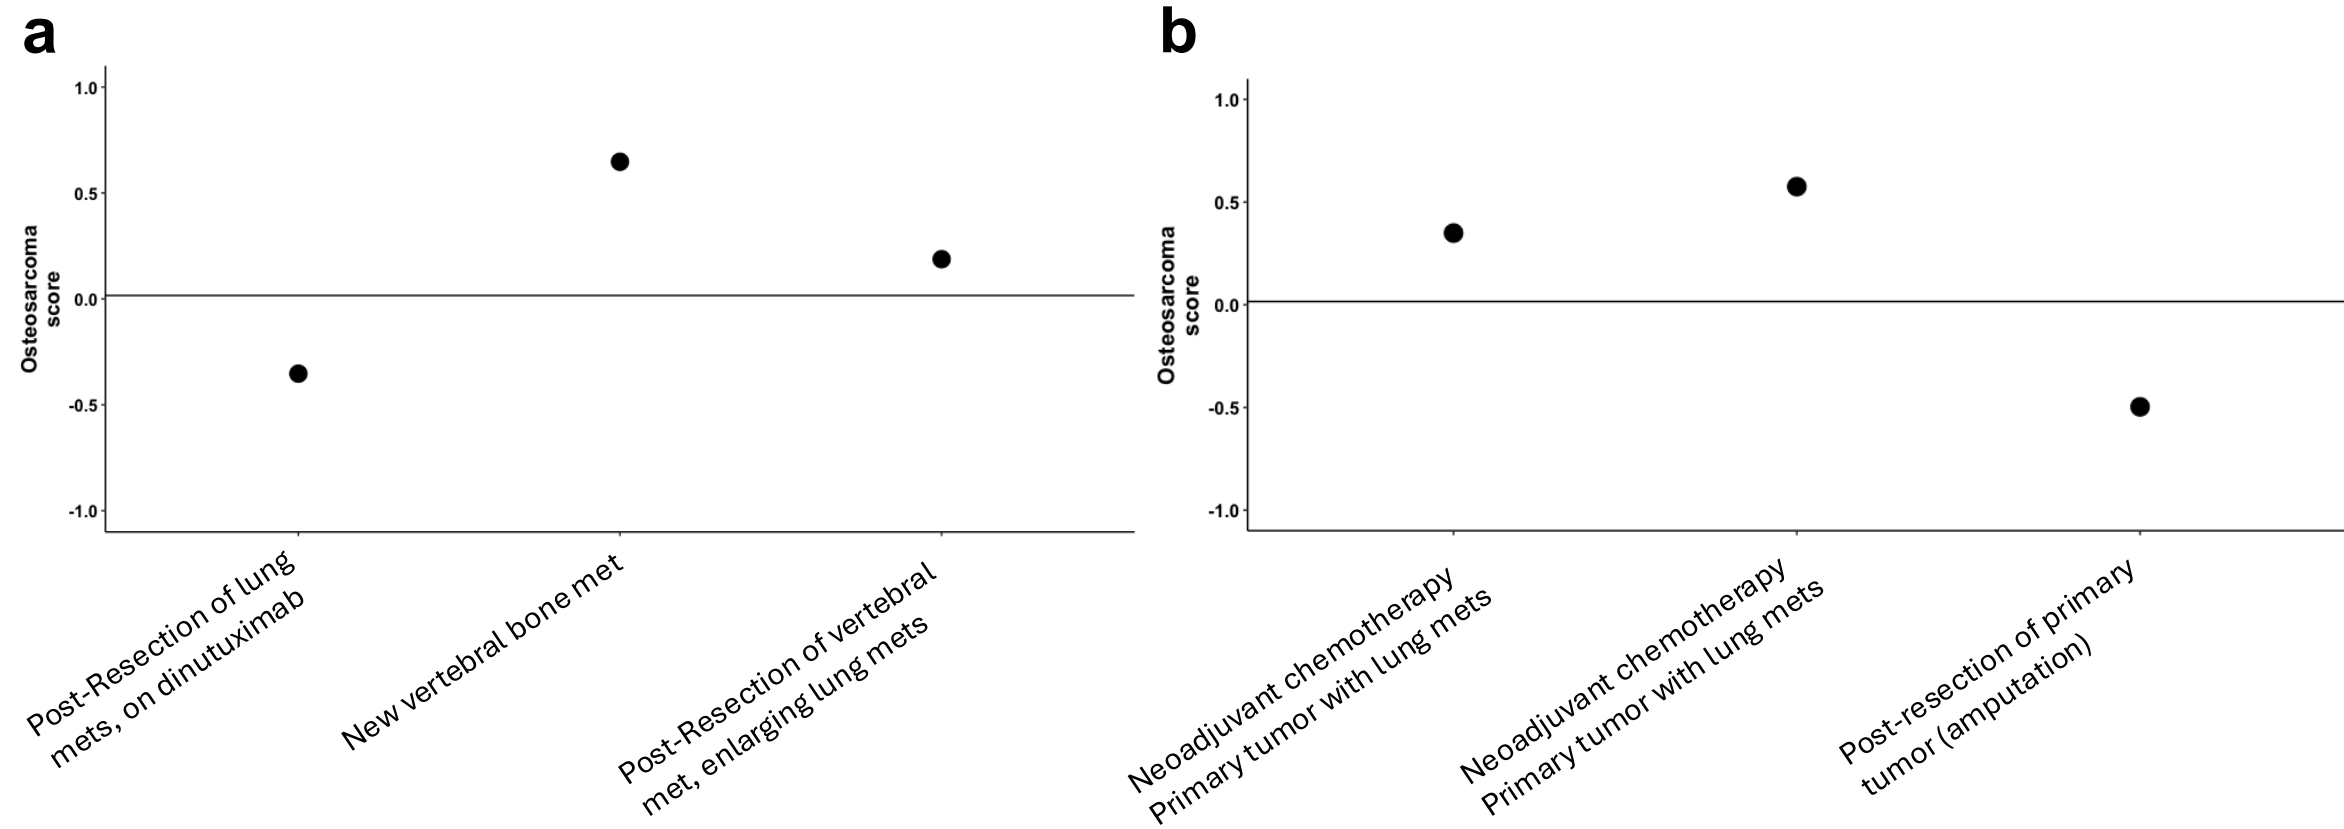

Supplement: Supplementary file 1 [file 4f2b0632fe7e84321b5455ed.pdf]
