# Supplementary material for: 5-hydroxymethylcytosine profiles in circulating cell-free DNA associate with disease status in patients with osteosarcoma
Source: Research Square preprint supplement (doi:10.21203/rs.3.rs-7199550/v1), 2025-09-01
Supplement: Supplementary file 1 [file bc79d1f4182858bd93b48d17.xlsx]

## Sheet: Supplementary Data 1
	Supplementary Data 1: Detailed sample-level information for each individual patient in the Discovery and Validation cohorts.
	Discovery Cohort
	Patient	No. Samples	Timepoint(s)	Disease Status	Disease Burden	Outcome
	1	3	Diagnosis	Active Disease (x2)	Localized Primary (x2)	Dead of Disease
			Neoadjuvant Chemotherapy
			Post-Resection	No Evidence of Disease	No Evidence of Disease
	2	2	Diagnosis	Active Disease	Localized Primary	Free of Disease
			Off Therapy	No Evidence of Disease	No Evidence of Disease
	3	5	Diagnosis	Active Disease	Localized Primary	Free of Disease
			Off Therapy (x4)	No Evidence of Disease (x4)	No Evidence of Disease (x4)
	4	4	Diagnosis	Active Disease (x3)	Localized Primary (x3)	Free of Disease
			Neoadjuvant Chemotherapy (x2)
			Post-Resection	No Evidence of Disease	No Evidence of Disease
	5	7	Diagnosis	Active Disease (x2)	Localized Primary (x2)	Free of Disease
			Neoadjuvant Chemotherapy
			Post-Resection	No Evidence of Disease (x5)	No Evidence of Disease (x5)
			Off Therapy (x4)
	Validation Cohort
	1	1	Off Therapy	No Evidence of Disease	No Evidence of Disease	Free of Disease
	2	1	Relapse/Refractory	Active Disease	Lung/Soft Tissue Mets	Free of Disease
	3	5	Off Therapy	No Evidence of Disease	No Evidence of Disease	Free of Disease
	4	5	Relapse/Refractory	Active Disease	Lung/Soft Tissue Mets (x3)	Dead of Disease
					Bone Mets (x2)
	5	2	Off Therapy	No Evidence of Disease	No Evidence of Disease	Free of Disease
	6	4	Off Therapy	No Evidence of Disease	No Evidence of Disease	Free of Disease
	7	1	Relapse/Refractory	Active Disease	Primary With Mets	Dead of Disease
	8	3	Adjuvant Chemotherapy (x2)	No Evidence of Disease	No Evidence of Disease	Free of Disease
			Off Therapy (x1)
	9	3	Relapse/Refractory	No Evidence of Disease (x1)	No Evidence of Disease (x1)	Dead of Disease
				Active Disease (x2)	Bone Mets (x1)
					Lung/Soft Tissue Mets (x1)
	10	3	Neoadjuvant Chemotherapy (x2)	Active Disease	Primary with Mets (x2)	Dead of Disease
			Post-Resection (x1)		Lung/Soft Tissue Mets (x1)
	11	1	Post-Resection	Active Disease	Positive Margins	Dead of Disease
	12	4	Off Therapy	No Evidence of Disease	No Evidence of Disease	Free of Disease
	13	8	Off Therapy	No Evidence of Disease	No Evidence of Disease	Free of Disease
	14	3	Neoadjuvant Chemotherapy (x2)	Active Disease	Primary with Mets	Dead of Disease
			Relapse/Refractory (x1)
	15	5	Diagnosis (x1)	Active Disease (x1)	Localized Primary (x1)	Free of Disease
			Adjuvant Chemotherapy (x2)	No Evidence of Disease (x4)	No Evidence of Disease (x4)
			Off Therapy (x2)
	16	5	Diagnosis (x1)	Active Disease (x3)	Localized Primary (x2)	Free of Disease
			Neoadjuvant Chemotherapy (x1)
			Relapse/Refractory (x3)		Lung/Soft Tissue Mets (x1)
				No Evidence of Disease (x2)	No Evidence of Disease (x2)
	17	1	Adjuvant Chemotherapy	Active Disease	Lung/Soft Tissue Mets	Dead of Disease

## Sheet: Supplementary Data 2
Supplementary Data 2: List of genes with differential 5-hmC in osteosarcoma patient cfDNA vs well children
Increased 5-hmC	Decreased 5-hmC
PRAMEF11	TMEM52
LHX8	HMGN2
SLC44A5	IFI44L
OLFM3	CDC7
AMY1C	AC118553.2
LCE3E	RHOC
SPRR2F	CACYBP
MROH9	H3-3A
BRINP3	COX20
OR2M3	RSAD2
OR5H14	MYCN
OR5H6	TTC32
ZIC4	OXER1
STRIT1	ETAA1
SI	MAT2A
USP17L11	CD302
USP17L15	CTLA4
USP17L18	FZD5
USP17L22	EPM2AIP1
USP17L23	EIF1B
USP17L5	CCR5
USP17L29	CD47
KCTD8	GP9
TECRL	CHST2
CSN2	MBNL1
HTN3	RAP2B
HTN1	PDCD10
PRR27	BLOC1S4
FDCSP	CPEB2
MUC7	UTP3
POU4F2	RCHY1
NPY2R	DSPP
ADAM29	PYURF
DUX4	TIGD2
TAS2R1	SPRY1
TAF11L4	PABPC4L
TAF11L5	SPCS3
TAF11L7	CDKN2AIP
TAF11L9	CYP4V2
TAF11L10	ISOC1
ISL1	PROB1
PCDHB1	ADRB2
AC244517.10	DUSP22
NMUR2	H2AC6
GABRA1	H2AC11
GABRG2	HLA-DRB5
FAM153B	HLA-DRB1
DEFB133	HLA-DQA1
DEFB114	KIAA1586
TFAP2D	OGFRL1
TFAP2B	CD164
TINAG	SERINC1
FUT9	RNF146
CLVS2	SLC35D3
NMBR	AL049844.3
LPA	FBXO30
NXPH1	IGF2BP3
ZNF727	FZD9
SPAM1	SAP25
AC134684.9	SYPL1
DEFB107A	DOK2
ADAM18	SLC39A4
ADAM2	RLN1
PI15	ZFAND5
KCNV1	HNRNPK
CSMD3	CKS2
ANKRD30A	NIPSNAP3B
OR5P3	RAB14
TRIM51GP	FUT7
TRIM64C	BX255925.3
OR4C11	TOR4A
OR5D3P	HPS6
OR5L2	PDCD4
TRIM51	PAOX
OR5AS1	ILK
OR8J3	TAF10
OR5T1	EIF4G2
OR8H1	RRAS2
OR8K3	FAM111A
AP002512.3	FTH1
OR5M1	ROM1
OR9G1	TAF1D
NXPE4	VSIG2
KIF21A	H4-16
C12orf40	SLC38A2
MUC19	PHLDA1
CNTN1	DUSP6
OR6C3	KBTBD7
OR6C4	ARF6
KCNC2	RTRAF
PPFIA2	SRP14
PRR20C	KBTBD13
PRR20D	TLNRD1
PRR20E	MEX3B
POTEM	AC013394.1
POTEG	ANTKMT
OR11H2	DPEP2
OR4N2	HIC1
OR4K17	RNF227
OR10G2	AC135178.3
OTX2	LGALS9C
KCNH5	RAB34
POTEB2	HEXIM1
AC134980.3	AC068234.1
GABRB3	DDX5
C16orf82	NT5C
CDH11	ARHGDIA
ANKRD30B	SLC16A3
OR10H4	MYL12A
ZNF208	RPL17-C18orf32
ZNF676	DOK6
ZNF728	PTBP1
RFPL4AL1	ZFP36
SCP2D1	PTGIR
DEFB116	SSTR4
SPINT3	MAFB
KRTAP7-1	SYS1
POTEH	ATP5F1E
NLRP2B	AL121845.2
NAP1L2	XBP1
CYLC1	PIM3
DACH2	SAT1
SERPINA7	SPIN4
AL035425.3	ZBTB33
RTL4	PRKY
SLC6A14	USP9Y
CT47A11
CT47A10
CT47A4
SPANXB1
SPANXA1
SPANXA2
SPANXD
CSAG2
CSAG3
MT-CO1

## Sheet: Supplementary Data 3
Supplementary Data 3: List of genes with increased expression in osteosarcoma tumors compared to peripheral blood from healthy donors
A1CF
A2M
AADACL3
AADAT
ABCA12
ABCA8
ABCB5
ABCC8
ABCC9
ABI3BP
ABRA
ACADL
ACAN
ACTA1
ACTC1
ACTG2
ACTN2
ADAM32
ADAMTS12
ADAMTS18
ADAMTS19
ADAMTS3
ADAMTS9
ADAMTSL1
ADAMTSL3
ADCY1
ADCY2
ADCYAP1
ADH1B
ADH7
ADIPOQ
ADRA1A
ADRA2C
AFP
AGT
AGTR1
AKR1B10
AKR1D1
ALDH1A3
ALDH1L2
ALS2CR11
ALX1
ALX4
AMOTL2
ANGPT2
ANGPTL1
ANGPTL2
ANGPTL3
ANGPTL5
ANGPTL7
ANK2
ANKFN1
ANKRD1
ANKRD34C
ANKRD45
ANO1
ANO3
ANO5
ANTXR1
APCDD1L
APLN
APLNR
APOB
APOC1
APOD
APOE
AQP4
ARGFX
ARHGAP28
ARHGAP29
ARHGEF15
ARMC4
ASB15
ASB5
ASCL1
ASPA
ASPN
ASTN1
ATP1A2
ATP1B4
ATP6V0D2
ATP6V1C2
B3GALT1
B3GAT2
B4GALNT1
BBOX1
BCHE
BCL6B
BGN
BHLHE22
BHMT2
BICC1
BMP5
BMP7
BMPER
BNC1
BOC
BVES
C10orf71
C11orf70
C11orf87
C14orf37
C14orf39
C1QTNF1
C1QTNF2
C1QTNF7
C1S
C3orf70
C6
C7
C8orf22
C8orf34
C8orf4
C8orf48
C9orf170
CA12
CA3
CACNA1G
CACNA1S
CACNA2D1
CACNG2
CADM3
CADPS2
CALCR
CALD1
CAMK2A
CAP2
CAPN6
CASC2
CASQ2
CBLN2
CBLN4
CCBE1
CCDC152
CCDC158
CCDC68
CCDC8
CCDC80
CCDC85A
CCL13
CCL18
CCL21
CCND1
CD276
CD300LG
CDC42BPA
CDH11
CDH12
CDH15
CDH19
CDH5
CDH6
CDR1
CDSN
CFI
CFTR
CGNL1
CH25H
CHRDL1
CHRNA1
CHST3
CLCA2
CLDN1
CLDN18
CLDN22
CLEC14A
CLSTN2
CLVS1
CMYA5
CNTN1
CNTN3
CNTN4
CNTN5
COL10A1
COL11A1
COL12A1
COL14A1
COL15A1
COL16A1
COL1A1
COL1A2
COL21A1
COL22A1
COL2A1
COL4A1
COL4A2
COL4A5
COL5A1
COL5A2
COL6A3
COL6A5
COL8A1
COL9A1
COLEC12
COMP
COX7A1
CP
CPE
CPN2
CPZ
CREB3L1
CRISPLD1
CRNDE
CRYAB
CSMD2
CSMD3
CSPG4
CSRNP3
CSRP2
CSRP3
CTGF
CTHRC1
CTSK
CX3CL1
CXCL12
CXCL13
CXCL14
CXorf36
CYP27C1
CYP39A1
CYP4X1
CYR61
DAPL1
DCDC2
DCLK1
DCN
DCX
DDAH1
DDI1
DDIT4L
DDR2
DGKB
DIO2
DIO3
DIRAS2
DISC2
DKK1
DLGAP2
DLX3
DLX5
DLX6
DMP1
DMRT3
DMRTA1
DMRTA2
DNAH14
DNAH5
DNAH9
DOK5
DPP10
DPP6
DPT
DPY19L2P1
DPYSL3
DSC3
DSCAM
DSCR8
DSG1
DSPP
DUSP27
DZIP1
EBF2
EBF3
ECM2
EDIL3
EDNRA
EDNRB
EFEMP1
EFNB3
EFS
EGFL6
EGFLAM
EGFR
EGR1
ELAVL2
EMCN
EMILIN3
EML1
EMP2
EMX2
EMX2OS
EN1
ENAH
ENPEP
ENPP1
ENTPD3
EPB41L4B
EPHA3
EPHA5
EPHA6
EPHA7
EPYC
ERBB4
ERRFI1
ESRRG
ESYT3
ETV1
EYA1
EYA4
F2RL2
F3
FABP4
FAM135B
FAM13C
FAM155A
FAM166A
FAM180A
FAM186A
FAM69C
FAM83B
FAP
FAT1
FAT3
FBLIM1
FBLN1
FBN1
FBXL7
FBXO17
FERMT1
FERMT2
FGF1
FGF12
FGF14
FGF23
FGF5
FGF7
FGFR3
FHL5
FIBIN
FIGN
FILIP1
FJX1
FLG2
FLJ16779
FLJ42393
FLNC
FLRT2
FLRT3
FMN2
FMO2
FMO3
FMO6P
FMOD
FN1
FNDC1
FNDC4
FOLH1
FOXA2
FOXF1
FOXF2
FOXL1
FOXP2
FRAS1
FREM2
FRMD6
FRMD7
FRMPD4
FRZB
FSTL5
FUT9
FZD10
FZD4
GABBR2
GABRA1
GABRA2
GABRA3
GABRA4
GABRB2
GABRE
GABRG1
GABRP
GALNT13
GALNT5
GAP43
GDF6
GDNF
GFRA1
GHR
GJA1
GJA5
GJB2
GJC1
GLDN
GLI2
GLI3
GLRB
GLT8D2
GNAT3
GNG12
GNG4
GPC6
GPIHBP1
GPNMB
GPR158
GPR22
GPR26
GPR37
GPR4
GPRC5A
GPX8
GREM1
GRHL2
GRIA1
GRIA2
GRIA3
GRIA4
GRIK2
GRIN2A
GRIN2B
GRIP2
GRM5
GRM6
GUCY1A2
GULP1
GXYLT2
GYG2
HAPLN1
HAS2
HCN1
HCN4
HECW1
HEPACAM
HES2
HEYL
HFM1
HHIP
HIF3A
HIST1H1A
HIST1H1D
HIST1H1E
HIST1H2AL
HIST1H2BM
HIST1H3B
HIST1H3I
HMCN1
HMGA2
HMGCLL1
HNF4G
HOTAIR
HOXA11
HOXA13
HOXC10
HOXC8
HOXC9
HOXD1
HOXD10
HOXD11
HOXD13
HOXD3
HOXD8
HOXD9
HRC
HS3ST2
HS3ST4
HS6ST2
HS6ST3
HSPA12A
HSPA4L
HSPB6
HSPB7
HSPB8
HTR3D
HTRA1
HUNK
HYDIN
IBSP
ID4
IFITM5
IGF1
IGF2BP1
IGFBP5
IGFN1
IGSF1
IL13RA2
IL17RD
IL33
INE2
INHBA
INTU
IP6K3
IRX1
IRX2
IRX5
ISLR
ISLR2
ITGA11
ITGBL1
ITIH5
IYD
JPH1
JPH2
KANK4
KCNA1
KCNA4
KCNA7
KCNB1
KCND2
KCNE4
KCNIP3
KCNJ13
KCNJ16
KCNJ5
KCNJ8
KCNK2
KCNK3
KCNMB2
KCNN2
KCNS3
KCNT2
KCTD4
KDELR3
KDR
KERA
KIAA1210
KIAA1217
KIAA1462
KIAA1644
KIAA1755
KIRREL
KITLG
KLB
KLK4
KRT222
LAMA1
LAMA4
LAMB1
LAMC2
LARP6
LBP
LECT2
LHCGR
LHFP
LHX6
LIFR
LIMCH1
LIN28B
LINGO1
LIPG
LMO3
LMOD1
LMOD2
LMX1A
LMX1B
LOX
LRAT
LRCH2
LRFN5
LRIG3
LRP1B
LRP2
LRP4
LRRC15
LRRC17
LRRC19
LRRC4C
LRRC55
LRRC8E
LRRIQ1
LRRTM2
LRRTM3
LRRTM4
LSAMP
LUM
LUZP2
LY6K
LYPD6
MAB21L2
MAGEA1
MAGEL2
MAGI1
MAMDC2
MAP1B
MASP1
MATN3
MB
MDFI
MDGA2
MECOM
MEGF10
MEOX2
MEPE
MFAP2
MFAP5
MGP
MID1
MIPOL1
MIR1282
MKX
MMP12
MMP13
MMP16
MMP2
MMP3
MNS1
MPDZ
MRO
MSX1
MSX2
MTRNR2L1
MTRNR2L10
MTRNR2L2
MTRNR2L3
MTRNR2L4
MTRNR2L5
MTRNR2L6
MTRNR2L7
MTRNR2L9
MUC15
MUC2
MUM1L1
MXRA5
MYBPC1
MYH1
MYH14
MYH2
MYH7
MYH8
MYL1
MYL2
MYO1B
MYOCD
MYOM3
MYOZ1
MYOZ2
MYPN
NAALADL2
NALCN
NCAM2
NCAN
NDP
NDST3
NDST4
NELL1
NES
NEUROG2
NFIB
NGF
NID2
NME5
NNMT
NOL4
NOS1
NOSTRIN
NOX4
NPAS3
NPNT
NPY1R
NPY2R
NPY5R
NR2F1
NR2F2
NR5A2
NRAP
NRG3
NRK
NRXN3
NTM
NTRK2
NUPR1
NXPH2
OGN
OLFM3
OLFML1
OLFML3
OMD
ONECUT2
OPCML
OPRK1
OPRM1
OR51E1
OSMR
P4HA3
PABPC1P2
PABPC4L
PABPC5
PAMR1
PANX3
PAPOLB
PAPPA
PARVA
PAX3
PAX7
PCDH10
PCDH15
PCDH17
PCDH18
PCDH19
PCDH20
PCDH7
PCDHB10
PCDHB11
PCDHB12
PCDHB13
PCDHB14
PCDHB16
PCDHB19P
PCDHB2
PCDHB3
PCDHB4
PCDHB5
PCDHB6
PCDHB7
PCDHGB8P
PCK1
PCLO
PCOLCE2
PCSK1
PCSK2
PDE10A
PDE11A
PDE1A
PDE1C
PDGFRA
PDGFRL
PDLIM3
PDPN
PDZRN3
PDZRN4
PGR
PHOX2B
PHYHIPL
PI15
PITX2
PKD1L2
PKHD1
PKNOX2
PKP1
PLA2G2A
PLA2R1
PLAC4
PLCB4
PLCE1
PLCXD3
PLN
PLOD2
PLP1
PLS3
PLSCR4
PMP2
PNMA2
POPDC3
POSTN
POTEM
POU3F2
PPARG
PPFIA2
PPIC
PPP1R1A
PPP1R3A
PPP1R3C
PPP2R2C
PRAME
PRDM6
PRELP
PREX2
PRIMA1
PRKAA2
PRKG1
PRND
PRPH
PRR23A
PRR9
PRRG1
PRRX1
PRRX2
PRSS12
PRTG
PSAPL1
PTCHD1
PTGFR
PTGIS
PTH1R
PTHLH
PTN
PTPN14
PTPN21
PTPRD
PTPRG
PTPRQ
PTPRT
PTPRZ1
PURG
PWRN2
PYGO1
QRFPR
RAB3B
RAD51AP2
RAG2
RAI14
RALYL
RAMP2
RANBP3L
RARB
RARRES1
RASD2
RASL12
RASSF9
RBFOX1
RBFOX2
RBMS3
RBP1
RBP4
RELN
RERG
RERGL
RFTN2
RGN
RGS22
RGS4
RGS7BP
RHBDL2
RHOJ
RIMS1
RIMS2
RIMS4
RNASE1
RND3
RNF128
RNF152
RNF180
ROBO2
ROS1
RP1
RPL13AP3
RPL23AP32
RPLP0P2
RSPO1
RSPO2
RSPO3
RUNX1T1
S100A16
SALL1
SALL3
SAMD5
SATB2
SATL1
SCARA3
SCG2
SCN1A
SCN3B
SELE
SEMA3D
SEMA3E
SEMA5A
SEMA5B
SEMA6D
SERPINA3
SERPINA5
SERPINB5
SERTAD4
SEZ6L2
SFRP1
SFRP4
SFTA1P
SGCD
SGCG
SH3D19
SH3GL2
SHISA6
SHISA9
SHOX2
SHROOM2
SHROOM3
SIM1
SIX1
SIX2
SIX4
SLC16A12
SLC16A9
SLC19A3
SLC1A2
SLC25A21
SLC26A10
SLC26A9
SLC36A2
SLC38A4
SLC5A1
SLC5A12
SLC5A7
SLC6A1
SLC6A14
SLC6A15
SLC6A17
SLC6A2
SLC6A7
SLC7A14
SLC7A2
SLC9A2
SLCO1C1
SLCO2A1
SLCO2B1
SLIT2
SLIT3
SLITRK1
SLITRK2
SLITRK3
SLITRK6
SLN
SMOC2
SMYD1
SNAI2
SNCAIP
SOD3
SORCS1
SOST
SOX1
SOX11
SOX17
SOX2
SOX9
SP7
SPARCL1
SPATA18
SPHKAP
SPINK5
SPP1
SPRY4
SRGAP1
SRL
SRPX
SRPX2
SRRM4
SSTR2
ST6GAL2
ST6GALNAC5
ST8SIA2
ST8SIA3
STC1
STC2
STEAP1
STEAP2
STMN2
STXBP5L
SULF1
SULT1C2
SVEP1
SYNC
SYNPO2L
SYT10
SYT12
SYT13
SYT14
SYT7
TAC1
TACC2
TACR1
TAS2R30
TBR1
TBX15
TBX18
TBX2
TBX3
TBX4
TBX5
TCEAL7
TCF21
TDO2
TEAD1
TEAD4
TEX15
TF
TFAP2A
TFAP2B
TFAP2C
TFPI
THBS2
THRSP
THSD4
THSD7A
THSD7B
THY1
TIMP3
TIMP4
TJP1
TLL1
TM4SF1
TM4SF18
TMC7
TMEM100
TMEM150C
TMEM196
TMEM200B
TMEM212
TMEM215
TMEM229A
TMEM26
TMEM47
TMEM98
TNC
TNFRSF11B
TNFRSF19
TNMD
TNN
TNNI1
TOX3
TPTE2P1
TRAM1L1
TRDN
TRIL
TRPA1
TRPC4
TRPC5
TRPM3
TSIX
TSKU
TSPAN11
TSPAN12
TSPYL6
TUSC3
TWIST1
UACA
UNC13C
UNC5C
UNC5D
USH2A
VAT1L
VAX1
VCAM1
VGLL2
VGLL3
VSNL1
VWA1
WBSCR17
WDR72
WDR87
WIF1
WISP1
WISP2
WNK3
WNT2
WNT5A
WWTR1
XKR4
YAP1
ZCCHC5
ZFHX4
ZFPM2
ZIC1
ZIC2
ZIC3
ZIC4
ZIC5
ZNF214
ZNF423
ZNF454
ZNF462
ZNF676
ZNF704
ZNF804B

## Sheet: Supplementary Data 4
	Supplementary Data 4: Ontology terms significantly enriched to both the osteosarcoma 5-hmC signature gene set and genes with with increased RNA expression in osteosarcoma tissue relative to peripheral blood from healthy controls. Identified using gProfiler.
	Ontology Source	Term Name
	GO:BP	nervous system process
	GO:BP	system process
	GO:BP	multicellular organismal process
	GO:CC	GABA-A receptor complex
	GO:MF	ligand-gated monoatomic anion channel activity
	GO:MF	GABA-gated chloride ion channel activity
	GO:MF	signaling receptor activity
	GO:MF	molecular transducer activity
	GO:MF	transmembrane signaling receptor activity

## Sheet: Supplementary Data 5
Supplementary Data 5: List of genes with increased expression in osteosarcoma tumors compared to normal bone
ISG15
ACOT7
PLOD1
FHAD1
MFAP2
C1QC
EPHB2
IFI6
LEPRE1
LPPR4
COL11A1
TAF13
ADORA3
ECM1
MLLT11
S100A10
C1orf85
SLAMF8
C1orf204
FCGR2A
FCGR2B
UCK2
HMCN1
VSNL1
HOXD13
HOXD11
COL3A1
CD28
SCG2
MSL3L2
IQCA1
COL6A3
GPC1
HRH1
CDCP1
WNT5A
TMEM45A
PLOD2
MFI2
NKX3-2
UCHL1
CXCL10
HHIP
SFRP2
TDO2
TRIP13
MRPL36
ADAMTS12
C1QTNF3
HAPLN1
PRR16
ZNF474
P4HA2
CXCL14
TGFBI
CD14
PCDHB2
C5orf46
ODZ2
STC2
GFPT2
F13A1
C2
TREM2
POPDC3
SLC16A10
COL10A1
ULBP2
ULBP1
THBS2
FSCN1
MGC87042
AMPH
SNORA5A
STEAP1
GAL3ST4
C7orf68
CALU
FAM180A
CTSB
MSR1
LOXL2
PI15
CRISPLD1
LAPTM4B
CTHRC1
HAS2
HAS2-AS1
SQLE
CDKN2A
PSAT1
ROR2
LHX2
PTGES
PLAU
CEP55
NPM3
C11orf41
FOLH1
PRSS23
MMP1
THY1
PANX3
LPAR5
BCAT1
NDUFA4L2
B4GALNT1
LOC100130776
EPYC
LUM
HSPB8
GJB2
POSTN
RPPH1
MMP14
SLC7A8
EGLN3
GSC
CHAC1
CA12
CD276
TNFRSF12A
SEZ6L2
GINS2
TUBB3
CCL13
PLXDC1
LOC100499467
PYCR1
STRA13
MOCOS
LIPG
C19orf10
RNASEH2A
C19orf53
GDF15
COMP
FCGBP
APOC2
FPR3
SNAP25
PLTP
KCNG1
APCDD1L
CBR1
CBS
COL6A1
MMP11
MIF
LGALS1
KDELR3
KAL1
EGFL6
PRDX4
GPR34
VSIG4
NRK
IL13RA2
